# Supplementary material
Source: PubMed Central journal article supplement (PMC7402270)
Supplement: NIHMS1603544-supplement-Supplementary_material.pdf [file NIHMS1603544-supplement-Supplementary_material.pdf]

## Supplementary section

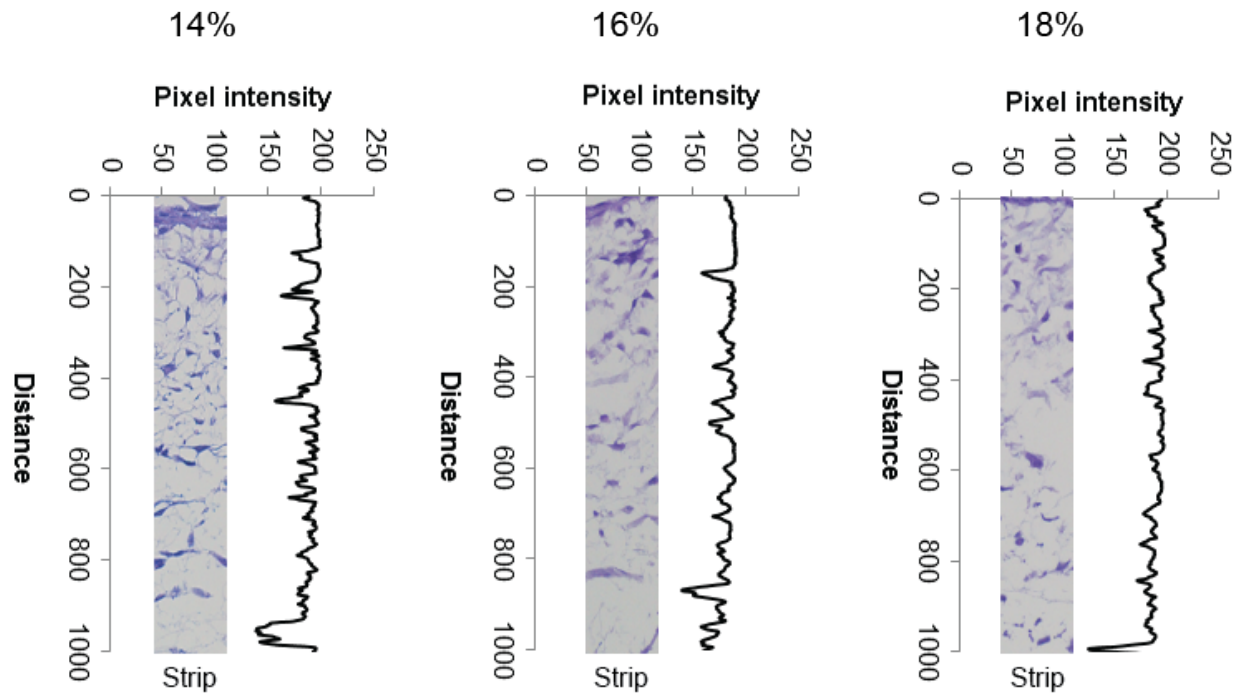

**Figure S1:** Intensity profile of the features across the H&E stained strip taken from the corresponding image in figure 5b obtained through ImageJ software. The intensity profiles of PVIC-cultured 14%, 16% and 18% scaffolds confirm the presence of PVICs throughout the scaffolds.

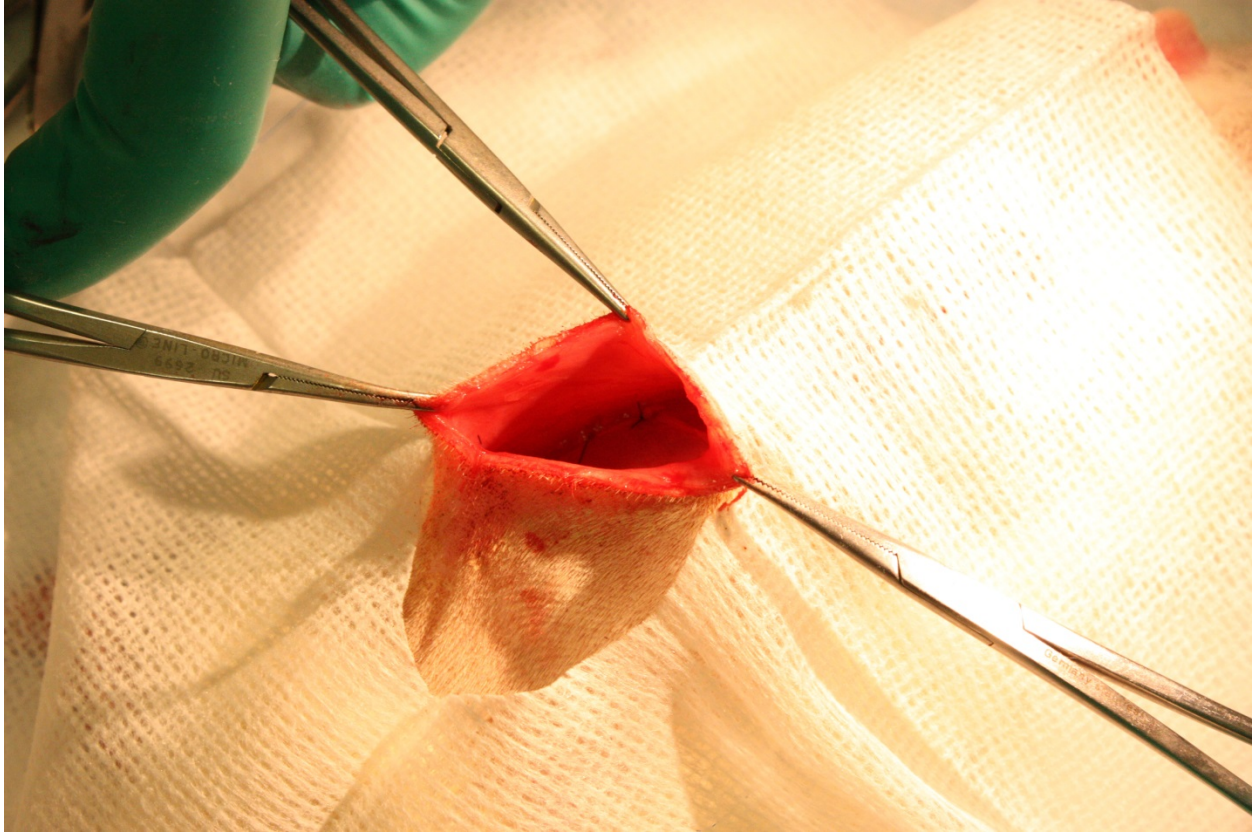

**Figure S2:** A total of three scaffolds - one scaffold of each type (14%, 16% and 18%), were implanted in a rat in its dorsal area. Photo was taken during implantation.

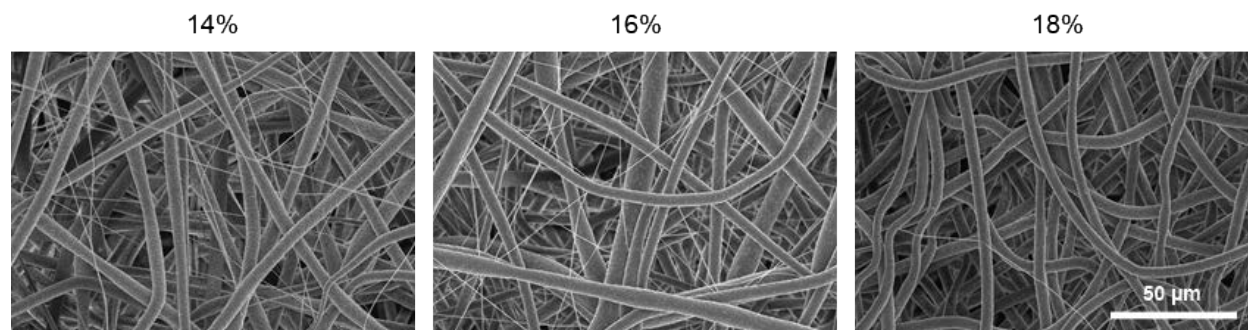

**Figure S3:** Scanning electron microscopy images of fibrous scaffolds produced by electrospinning 14, 16 and 18% PCL. The scaffolds contain both nanofibers and microfibrils. Among them, number of nanofibers was highest in 14% scaffold and lowest in 18% scaffold.
